# Supplementary material for: An unconventional charge compensation mechanism for proton insertion in aqueous Zn-ion batteries
Source: Royal Society of Chemistry journal article supplement (doi:10.1039/d4ta05214e), 2024-01-01
Supplement: d4ta05214e1.pdf [file d4ta05214e1.pdf]

## Supplementary Information

### **Unconventional Charge Compensation Mechanism for Proton Insertion in Aqueous Zn-Ion Batteries**

Jiwei Wang,<sup>a</sup> Heran Huang,<sup>b</sup> Linna Qiao,<sup>b</sup> Haonan Wang,<sup>b</sup> Krystal Lee,<sup>a</sup> Guangwen Zhou,<sup>b,c</sup> Hao Liu<sup>a,b\*</sup>

<sup>a</sup>Department of Chemistry, Binghamton University, Binghamton, New York 13902, United States

<sup>b</sup> Materials Science and Engineering, Binghamton University, Binghamton, New York 13902, United States

<sup>c</sup> Department of Mechanical Engineering, Binghamton University, Binghamton, New York 13902, United States

Figures S1-S10

Tables S1-S2

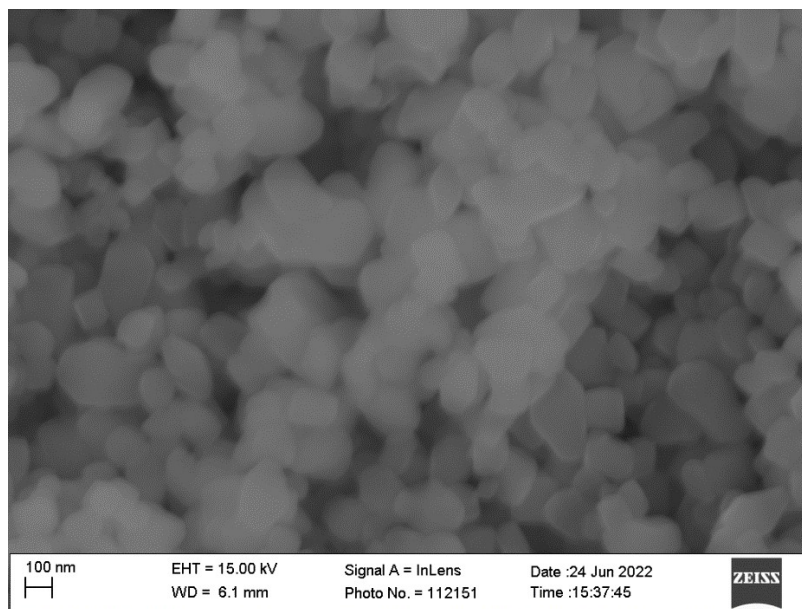

**Figure S1.** Scanning electron microscopy image of the as-synthesized  $\epsilon$ -VOPO<sub>4</sub> powder.

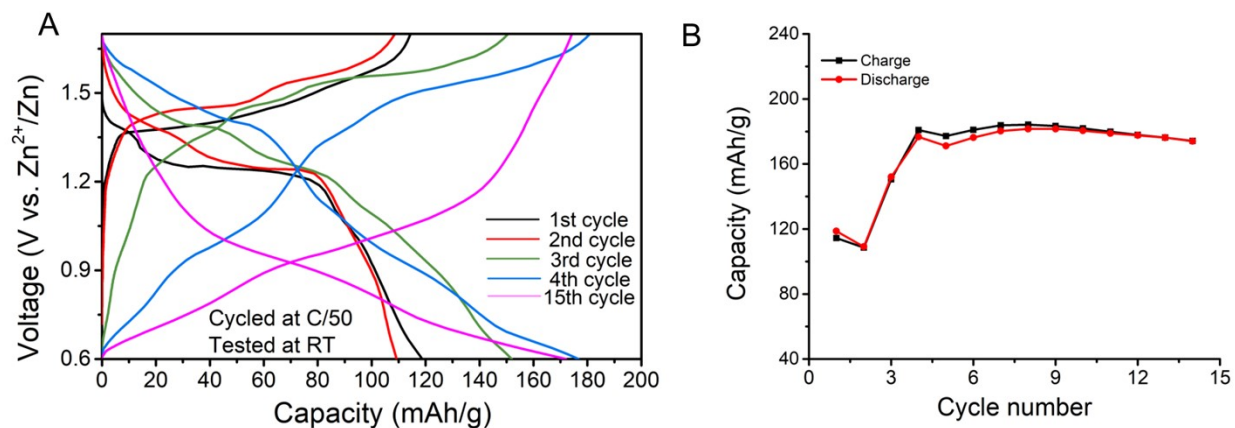

**Figure S2.** Voltage profile of the galvanostatic cycling of the  $\epsilon$ -VOPO<sub>4</sub> cathode cycled at C/50 between 0.6 V and 1.7V at different cycles, and (B) the corresponding capacity retention vs cycle number.

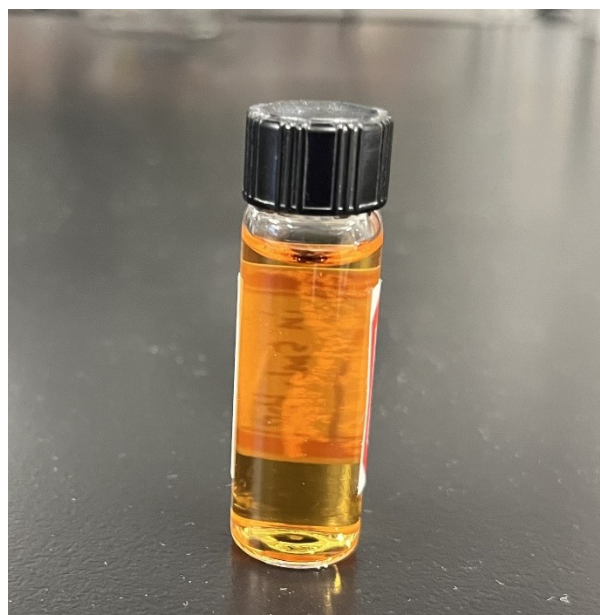

**Figure S3.** Aqueous solution obtained after soaking the as-synthesized  $\epsilon$ -VOPO<sub>4</sub> powder in water (1 mg/mL) for 5 days. The  $\epsilon$ -VOPO<sub>4</sub> powder was completely dissolved in water forming a transparent light orange solution.

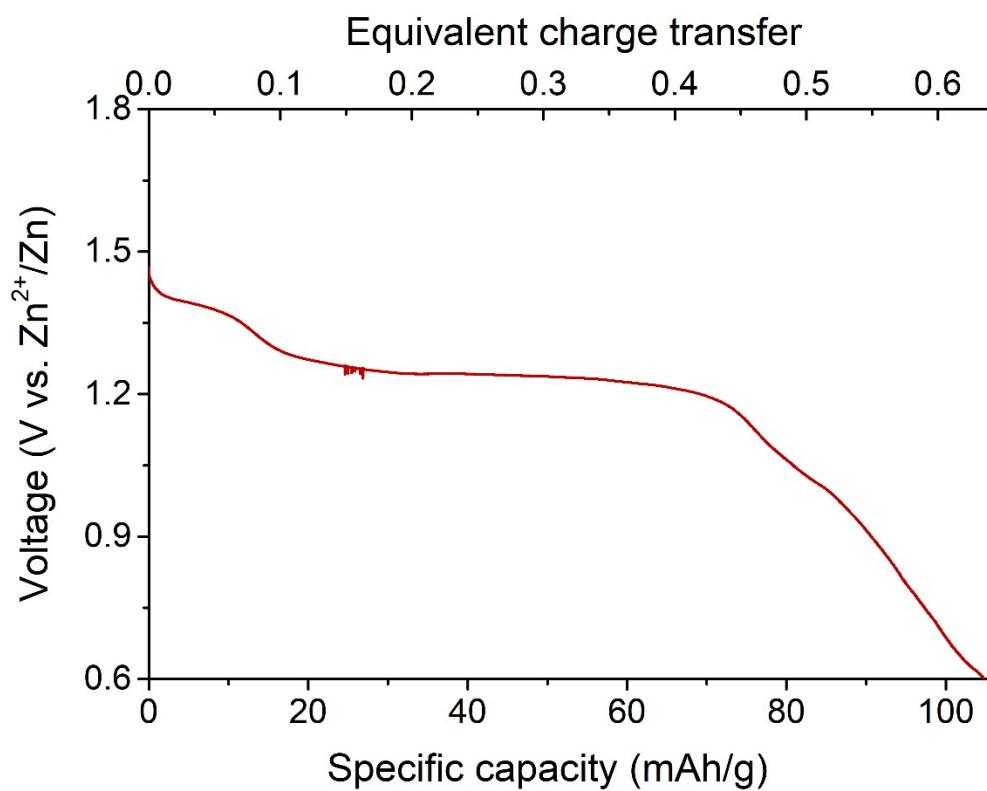

**Figure S4.** Voltage profile for the discharge of the electrode prepared for the high-resolution XRD.

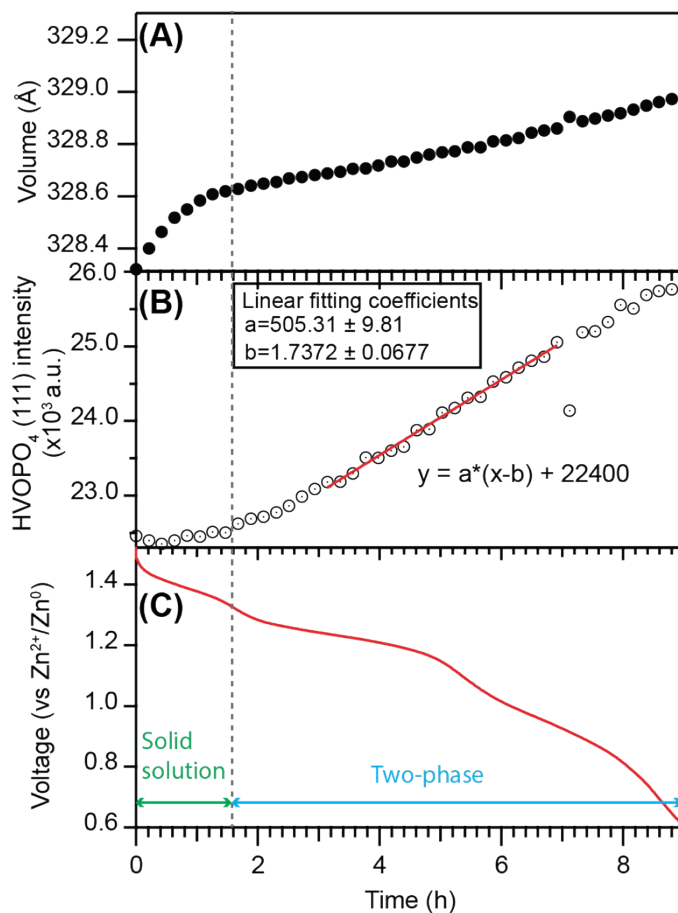

**Figure S5.** (A) Unit cell volume of VOPO<sub>4</sub>, (B) intensity of the HVOPO<sub>4</sub> (111) peak at 4.2° 2θ, which overlaps with the (200) and (002) peaks of HVOPO<sub>4</sub>, and (C) discharge voltage profile during the operando XRD measurement.

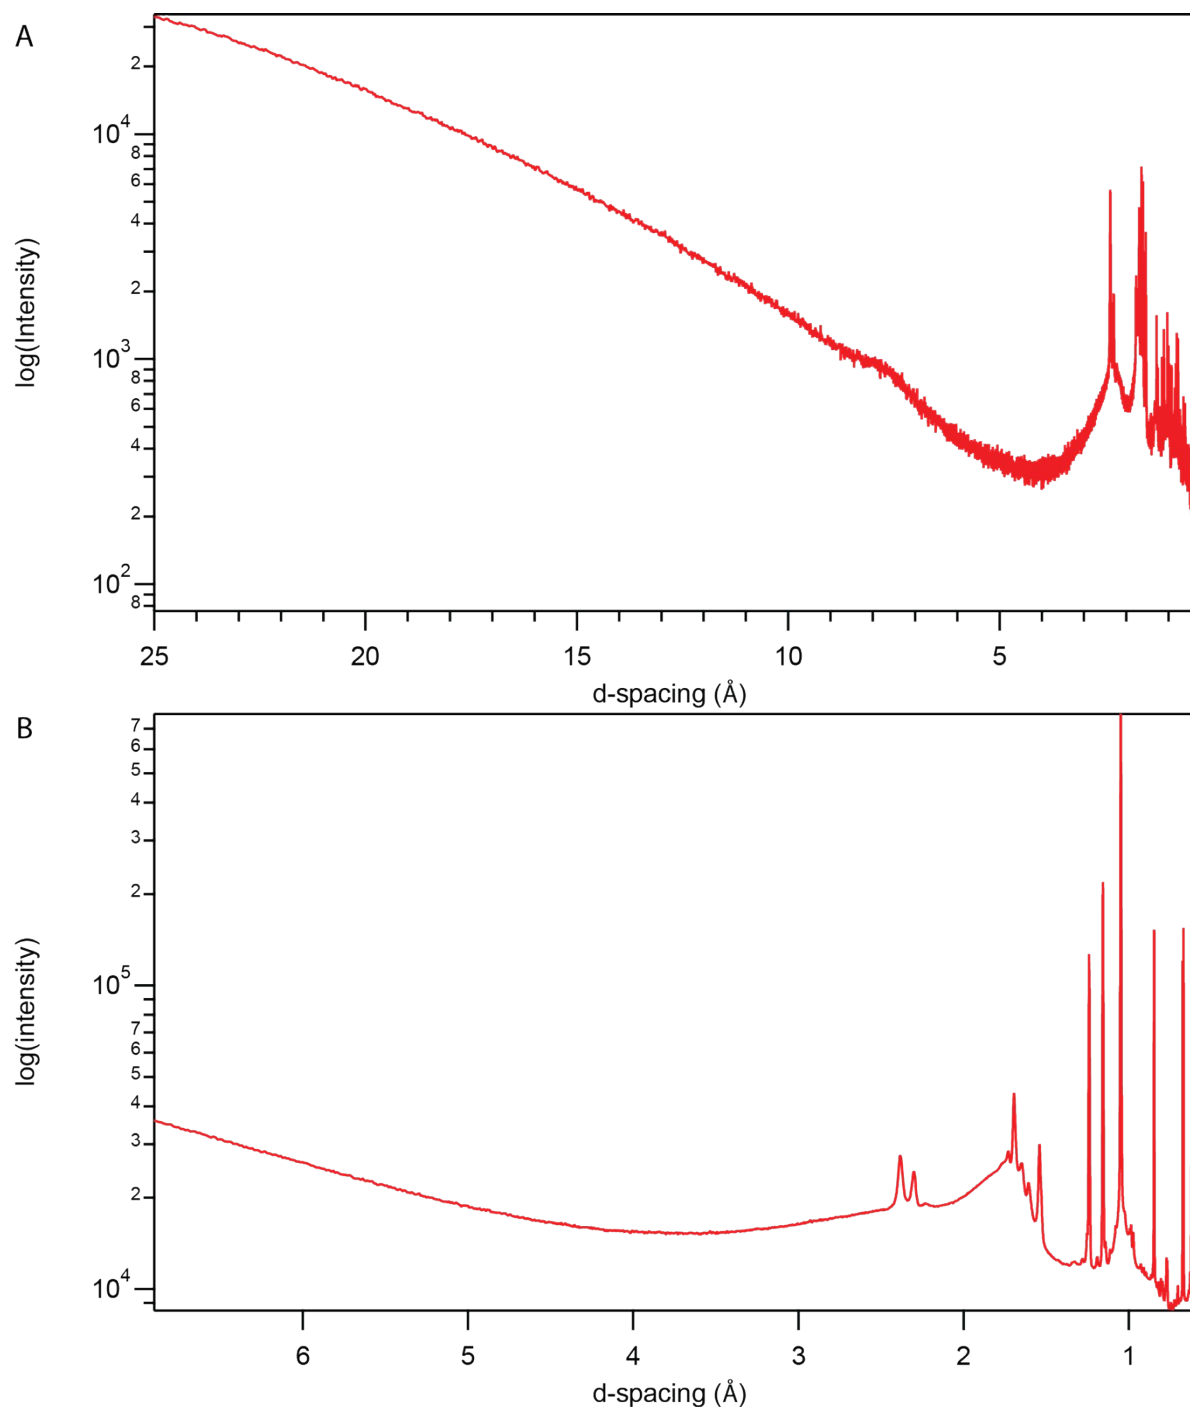

**Figure S6.** (A) High-resolution synchrotron XRD observed for the  $\text{VOPO}_4$  electrode discharged to 0.6 V. (B) *Operando* synchrotron XRD observed at the end of discharge at 0.6 V. No peaks are observed above the d-spacing for the first Bragg peak from the (H) $\text{VOPO}_4$  phase. The intensity is plotted in logarithmic scale to highlight low intensity features.

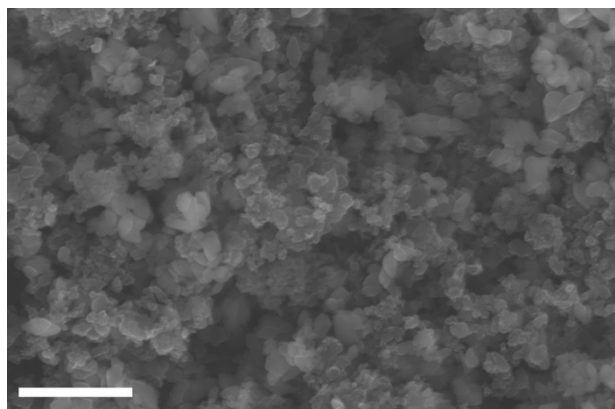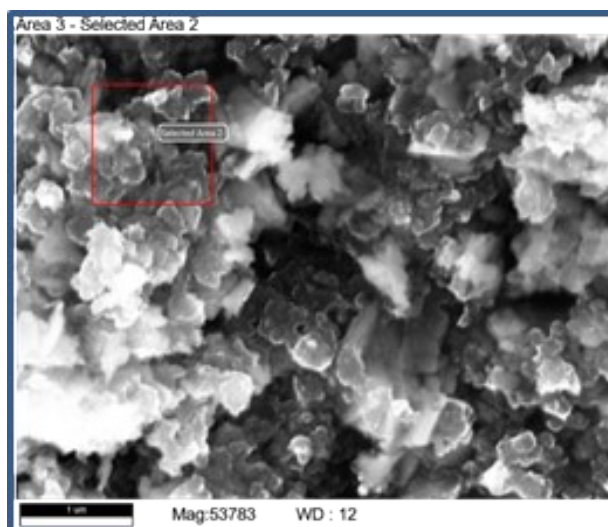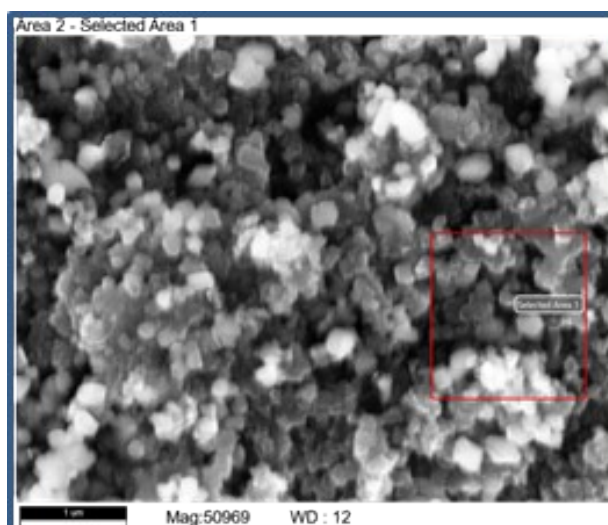

**Figure S7.** SEM images of the pristine electrode (top) and electrode discharged to 0.6 V (middle) and recharged to 1.7 V (bottom). No significant morphological differences are observed. Scale bar corresponds to 1  $\mu$ m.

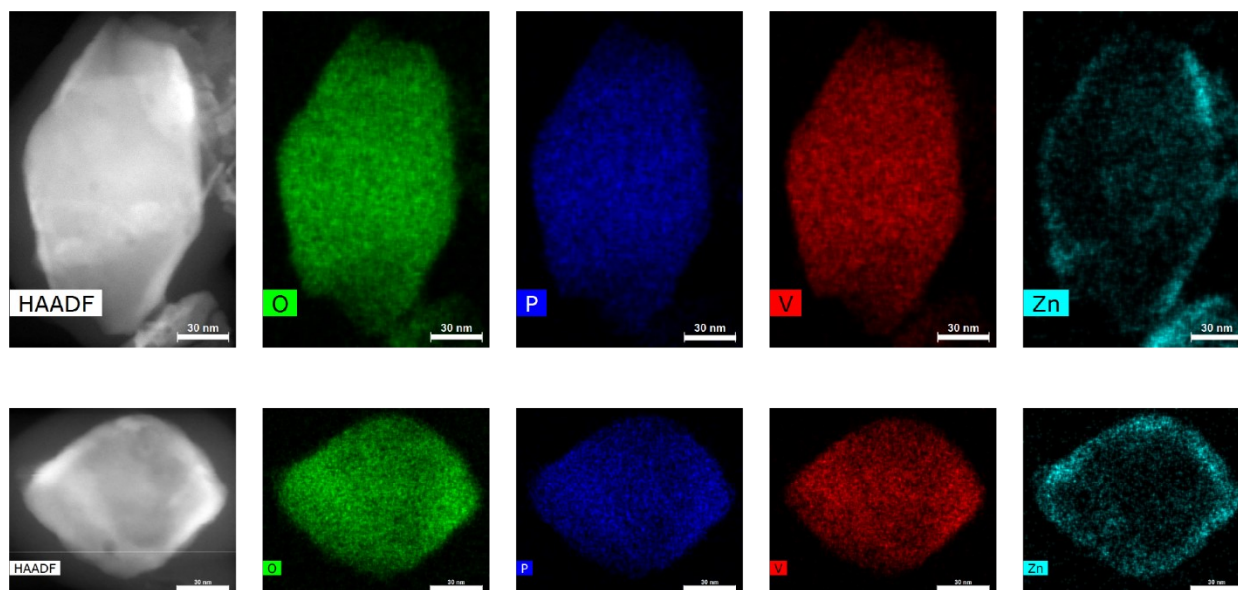

**Figure S8.** TEM EDS mapping of two particles in the electrode discharged to 0.6 V. Zn primarily accumulates on the particle surface. Scale bar corresponds to 30 nm.

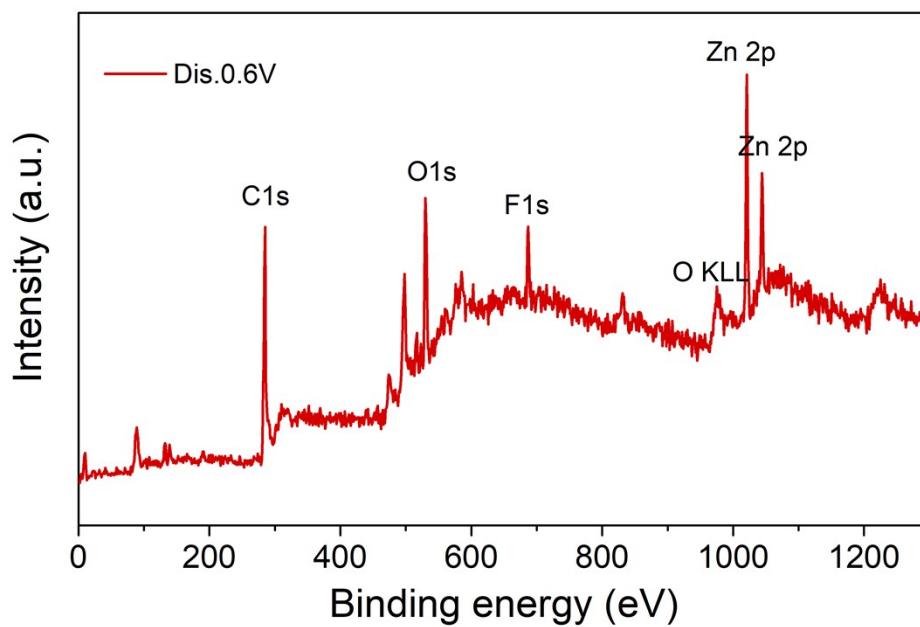

**Figure S9.** XPS survey spectrum of the electrode discharged to 0.6V.



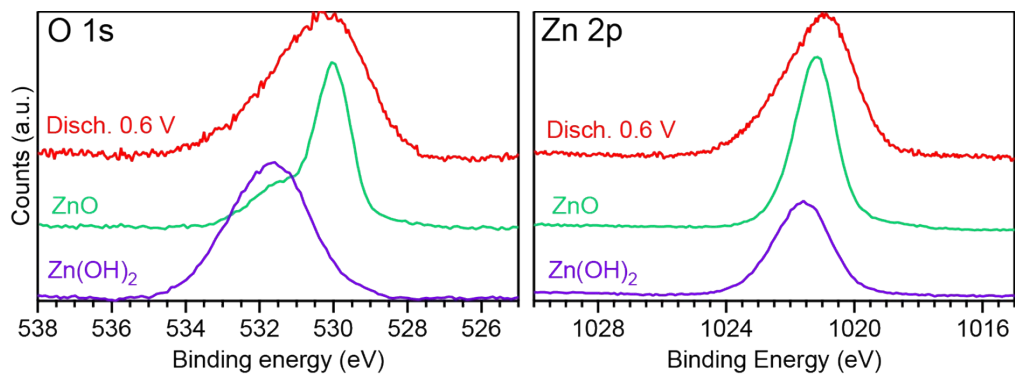

**Figure S10.** XPS of the O 1s and Zn 2p core levels for ZnO, Zn(OH)<sub>2</sub>, and the electrode discharged to 0.6 V (Disch. 0.6 V).

**Table S1.** Refined structure parameters of HVOPO<sub>4</sub>

$a = 7.43003(16) \text{ \AA}$ ,  $b = 7.06750(13) \text{ \AA}$ ,  $c = 7.37430(14) \text{ \AA}$ ,  $\alpha = \gamma = 90^\circ$ ,  $\beta = 120.0659(7)^\circ$

Volume = 335.135(12)  $\text{\AA}^3$

| Site label | atom | x          | y          | z          | occupancy | B       | Wyckoff |
|------------|------|------------|------------|------------|-----------|---------|---------|
| V1         | V    | 0.4799(5)  | 0.2579(6)  | 0.4771(4)  | 1         | 2.66(4) | 4a      |
| P1         | P    | 0.2176(7)  | 0.6262(3)  | 0.2005(6)  | 1         | 1       | 4a      |
| O1         | O    | 0.6944(10) | 0.3354(5)  | 0.6993(13) | 1         | 1       | 4a      |
| O2         | O    | 0.0290(8)  | 0.5102(8)  | 0.0421(8)  | 1         | 1       | 4a      |
| O3         | O    | 0.3806(8)  | 0.5168(9)  | 0.4158(10) | 1         | 1       | 4a      |
| O4         | O    | 0.1193(8)  | 0.7786(8)  | 0.2942(7)  | 1         | 1       | 4a      |
| O5         | O    | 0.3199(9)  | 0.7415(10) | 0.1063(8)  | 1         | 1       | 4a      |

**Table S2.** Zn 2p<sub>3/2</sub> binding energy (BE) reported for cycled electrodes in AZIBs.

| BE (eV) | Assignment                                                                                             | Reference                            |
|---------|--------------------------------------------------------------------------------------------------------|--------------------------------------|
| 1022.4  | Zn <sub>4</sub> (SO <sub>4</sub> )(OH) <sub>6</sub> ·5H <sub>2</sub> O                                 | Chem. Mater. 2021, 33, 4089–4098     |
| 1022.6  | Intercalated Zn in V <sub>2</sub> O <sub>5</sub> crystal lattice                                       | Adv. Funct. Mater. 2023, 33, 2303763 |
| 1022    | Zn <sub>3</sub> (OH) <sub>2</sub> V <sub>2</sub> O <sub>7</sub> ·3H <sub>2</sub> O                     | ACS Energy Lett. 2020, 5, 2979–2986  |
| 1024    | Zn <sub>12</sub> (CF <sub>3</sub> SO <sub>3</sub> ) <sub>9</sub> (OH) <sub>15</sub> ·xH <sub>2</sub> O |                                      |
| 1022    |                                                                                                        |                                      |
| 1022.1  | Indigenous Zn in Zn <sub>0.25</sub> V <sub>2</sub> O <sub>5</sub> ·nH <sub>2</sub> O                   | Nat Commun 14, 3067 (2023).          |
| 1023.7  | Intercalated Zn in Zn <sub>0.25</sub> V <sub>2</sub> O <sub>5</sub> ·nH <sub>2</sub> O                 |                                      |
| 1027.4  |                                                                                                        |                                      |
